# Supplementary material
Source: Research Square preprint supplement (doi:10.21203/rs.3.rs-9060718/v1)
Supplement: Supplementary file 1 [file 60965901cefb6a6f4e4e3b8c.docx]

(Supplementary) S1

**Questionnaire:**

We are medical students at Ibb University, conducting a study to evaluate patients' knowledge, attitudes, and practices regarding diabetes complications in private clinics in Ibb city. You have been selected to participate in this questionnaire which will provide valuable information on this topic. The study results will help in developing programs to improve awareness about diabetes and its complications. We confirm the confidentiality of your information and its use for research purposes only. Thank you for your cooperation.

Section 1: Demographic Information

| Variable | Category | |
| --- | --- | --- |
| Gender | Male | |
|  | Female | |
| Age | ……. Y | |
|  | 20 to 39 Y | |
|  | 40 to 59 Y | |
|  | ≥ 60 Y | |
| Marital Status | Married | |
|  | Single | |
|  | Divorced or a widow | |
| Education Level | Illiterate | |
|  | Reads and Writes | |
|  | Primary | |
|  | Secondary | |
|  | University or Higher | |
| Job | Student | |
|  | Employee | |
|  | Out of work | |
|  | Worker | |
|  | House wife | |
|  | Retired | |
| Living area | Rural | |
|  | Civilize | |
| Income | Low | |
|  | Moderate | |
|  | High | |
| Section 2: Medical History | | |
| Duration of diabetes | | From 1 to 5 Y |
|  | | From 6 to 10 Y |
|  | | From 11 to 15 Y |
|  | | More than 15 Y |
| Type of diabetes | | Type 1 |
|  | | Type 2 |
|  | | I do not know |
| Discovery Method(How was your diabetes discovered) | | Routine investigations |
|  | | Coincidence |
|  | | Symptoms |
| Family history of the disease | | Yes |
|  | | No |
| Use of herbal medicines | | Yes |
|  | | No |
| Management Plan(Treatment method) | | Diet and oral drugs |
|  | | Diet and insulin |
|  | | Non |
| Drugs(Diabetes medications you use?) | | Insulin |
|  | | Pills |
|  | | Insulin and pills |
| Follow Up(Blood sugar monitoring) | | Self-monitoring |
|  | | Hospital |
|  | | Non |

Section 3: Patients' Knowledge about Diabetes Complications

*Instructions: Please mark (√) in front of the correct or incorrect answer for each statement.*

| No. | Items | True | False |
| --- | --- | --- | --- |
| 1 | Diabetes leads to kidney problems |  |  |
| 2 | Diabetic patients are more susceptible to pneumonia |  |  |
| 3 | Stroke is one of the complications of diabetes |  |  |
| 4 | Diabetes can lead to heart disease |  |  |
| 5 | High blood sugar for a long time can affect the eye "retinopathy" |  |  |
| 6 | Peripheral nerve damage (diabetic neuropathy) is one of the causes of diabetic foot |  |  |
| 7 | Diabetic foot ulcers and wounds heal easily |  |  |
| 8 | High blood pressure is considered a complication of diabetes |  |  |
| 9 | Diabetes can lead to tooth decay |  |  |
| 10 | Regular blood sugar level testing is important |  |  |
| 11 | Skin color change in the foot is a symptom of diabetic foot |  |  |

Section 4: Patients' Attitudes about Diabetes Complications

*Instructions: Please mark (√) under the option that expresses your opinion on each statement (your agreement about the statement).*

| No. | Statement | Your Attitude | | | | |
| --- | --- | --- | --- | --- | --- | --- |
| Agree | | Natural | Disagree | |
| 1 | You worry about diabetes complications | |  |  |  |
| 2 | You believe you can control diabetes | |  |  |  |
| 3 | You are willing to change your lifestyle to control diabetes complications | |  |  |  |
| 4 | You trust the information you receive from the doctor about diabetes complications | |  |  |  |
| 5 | You believe that regular examinations are necessary for early detection of diabetes complications | |  |  |  |
| 6 | You believe that controlling blood sugar levels reduces complications | |  |  |  |
| 7 | You are interested in reading health information about diabetes and its complications | |  |  |  |
| 8 | You believe that healthy food is important for preventing diabetes complications | |  |  |  |
| 9 | You believe that monitoring cholesterol level is important for diabetes patients | |  |  |  |
| 10 | You believe that regular exercise helps control diabetes complications | |  |  |  |

Section 5: Patients' Practices regarding Diabetes Complications

*Instructions: Please mark (√) under the option that describes the extent to which you perform the following action (your degree of practicing the action).*

| No. | Statement | Your Practice Level | | |
| --- | --- | --- | --- | --- |
| High | Medium | Low |
| 1 | You visit the doctor regularly |  |  |  |
| 2 | You check blood sugar level regularly |  |  |  |
| 3 | You check blood pressure |  |  |  |
| 4 | You examine your feet daily |  |  |  |
| 5 | You have regular eye examinations |  |  |  |
| 6 | You check your kidneys periodically |  |  |  |
| 7 | You care about oral and dental health |  |  |  |
| 8 | You take your medications regularly |  |  |  |
| 9 | You read about diabetes complications |  |  |  |
| 10 | You control your weight |  |  |  |
| 11 | You check cholesterol levels |  |  |  |
| 12 | You exercise regularly to prevent diabetes complications |  |  |  |
| 13 | You follow a healthy diet to prevent diabetes complications |  |  |  |
